# **Maintained electrical transmission corridors can provide valuable bumblebee habitat for conservation and ecosystem service provision.**

Bruce Hill<sup>1</sup> and Ignasi Bartomeus<sup>2\*</sup>.

<sup>1</sup> Dunedin City Council, 50 The Octagon, Dunedin 9016, New Zealand.

<sup>2</sup> Estación Biológica de Doñana (EBD-CSIC), Avda. Américo Vespucio s n, Isla de la Cartuja, E-41092 Sevilla, Spain.

\*corresponding author: [nacho.bartomeus@gmail.com](mailto:nacho.bartomeus@gmail.com)

## **Abstract**

Decline in pollinator abundance and diversity is not only a conservation issue but also a threat to crop pollination. Maintained infrastructure corridors, including electricity transmission lines, are potentially valuable wild pollinator habitat. However, this potential is hindered by a lack of evidence comparing wild pollinator's abundance and diversity on transmission corridors with other recognized wild pollinator habitats. We study the influence of transmission corridors on a key pollinator group, bumblebees, in Sweden's Uppland region by comparing bumblebee abundance and diversity in transmission corridors with that in other habitats. Our results show that a transmission corridor's presence has no impact on the surrounding area's bumblebee diversity. However, transmission corridors and other maintained habitats have an abundance and diversity of bumblebees as high as semi-natural grasslands and do sustain species important both from a conservation and an ecosystem service provision perspective. Under their current management regime transmission corridors already provide valuable bumblebee habitat, but given that forage plant density is the main determinant of bumblebee abundance, they could be further enhanced by establishing and maintaining key forage plants. We show that in northern temperate regions habitats like those within maintained transmission corridors can complement agri-environmental schemes (AES) to assist in both bumblebee conservation and securing the ongoing provision of the ecosystem service they provide.

## **Keywords**

*Bombus*, ecosystem service, pollination, maintained electricity transmission corridor, EU Common Agricultural Policy, Sweden.

## 30 Introduction

31 Pollinators provide an essential ecosystem function, as 80% of plants are dependent on  
 32 animal pollination for their reproduction (Ollerton et al. 2011). The provision of ecosystem  
 33 services by pollinators is equally essential, with 35% of total global crop production  
 34 dependent on animal pollination (Klein et al, 2007). The discrepancy between supply and  
 35 demand for honeybees provision of pollination has resulted in wild pollinator's contribution  
 36 to this service gaining more recognition (Breeze et al. 2014), as wild pollinators service is  
 37 often equal, complementary or superior to that provided by honeybees (Garibaldi et al,  
 38 2013). While only a minority of bee species provide most of the pollination service to crops  
 39 (Kleijn et al. 2015) the main non managed pollinators worldwide are bumblebees (e.g.  
 40 *Bombus terrestris* and *lapidarius* in Europe). Bumblebees (*Bombus* sp.) are also regarded  
 41 as a key pollinator group in temperate regions and as they forage more effectively in  
 42 colder temperatures than other bees, their importance increases with latitude (Corbet et al,  
 43 1994).

44 Pollinators are threatened by human induced environmental change, including habitat loss,  
 45 climate change and pesticides use (Winfree et al. 2011, Gonzalez-Varo et al. 2013).  
 46 There's evidence that bumblebees are more sensitive to these changes than other bee  
 47 species (Bartomeus et al. 2013) and despite some bumblebee species are thriving and  
 48 can use human modified habitats, others are declining or near-extinct (Bartomeus et al  
 49 2013, Cameron et al. 2011). A factor adversely affecting bumblebee populations is habitat  
 50 destruction (Vanbergen et al, 2013) and a corresponding loss of preferred host plant  
 51 species (Scheper et al. 2014). Semi-natural grasslands, a habitat favoured by bumblebees  
 52 for both nesting and foraging (Svensson et al, 2000) have decreased by 12.8% from 1990  
 53 to 2003 in Europe (FAO, 2006), while populations of 31 of Europe's 68 bumblebee species  
 54 are declining, 16 of which are threatened with extinction (Niето et al 2014).

55 In response to declines in pollinators many government and international organisations are  
 56 recognising the importance of maintaining pollinator services (EU, 2011). With the benefit  
 57 pollinators provide at the global and EU level being estimated at €153 and €15 billion  
 58 respectively (Gallai et al. 2009), ecosystem service provision is a significant policy area.  
 59 The policy responses include regulations, education and incentives. Such incentives

60 available in the EU includes payments made through the EU Common Agricultural Policy  
61 (CAP) Agri-environmental schemes (AES'). The use of AES' for ecological enhancement  
62 and their application on farmland have been shown to boost bumblebee nesting and  
63 foraging habitat (Lye et al. 2009, Cavell et al. 2007 & 2011, Scheper et al. 2013). However,  
64 human-modified areas outside the farmland have received little attention so far from the  
65 policy makers.

66 Outside of such planned approaches for pollinator conservation is the growing recognition  
67 of managed infrastructure corridors, such as electricity transmission corridors (hereafter  
68 transmission corridors; Russell et al. 2005, Wagner 2014, Berg 2011, 2013), roadsides  
69 (Hopwood et al. 2010, Hanley et al. 2015) and railway embankments (Moron' et al. 2014)  
70 as valuable pollinator habitat (Eldegard et al. 2015). The routine, utilitarian maintenance  
71 and disturbance of maintained infrastructure corridors provides the early successional  
72 landscapes required by many classes of pollinators (Wojcik & Buchmann 2012). Roadside  
73 mowing has increased bee and butterfly abundance in the Netherlands (Noordijk et al,  
74 2009), bee fauna in mown transmission corridors is richer than in adjoining annually mown  
75 grassy fields in Maryland, USA (Russell et al. 2005), while in Sweden butterflies were more  
76 abundant in transmission corridors than in semi-natural grasslands (Berg et al. 2011,  
77 2013). In the USA Integrated Vegetation Management (IVM) in transmission corridors has  
78 improved threatened butterflies Frosted Elfin (*Callophrys irus*) and Karner Blue (*Lycaeides*  
79 *Melissa samuelis*) habitats (Environment 360, 2014; Forrester et al. 2005). While roadside  
80 verges and railway embankments can be considered part of the semi-natural habitats and  
81 many studies show positive effects of these on pollinators (Winfree et al. 2011),  
82 transmission corridors, especially in northern Europe, create a unique habitat by providing  
83 herbaceous vegetation in an otherwise forested landscape. Moreover, transmission  
84 corridors have the potential to act as dispersal paths connecting different habitats (Haddad  
85 1999). However, many aspects about pollinator abundance and diversity is yet unknown,  
86 including how transmission corridors compare to other recognised valuable pollinator  
87 habitat and how the maintenance costs of different managed infrastructure corridors and  
88 their respective populations of pollinators compare (Wojcik & Buchmann, 2012).

89 With the many threats to pollinator populations the identification of transmission corridors

and other maintained infrastructure corridors as valuable habitat is timely. Here, we study the influence of transmission corridors on a key pollinator group, bumblebees, in Sweden's Uppland region by comparing bumblebee diversity in transmission corridors with that in other habitats. Declines in bumblebee habitat and diversity in Sweden mirror those in the rest of Europe, with the area of grasslands being estimated at being below 10% of its extent a century ago (Palmgren 2010), whilst 18 of 41 Swedish species are in decline and seven are threatened with extinction (Nieto et al. 2014).

We compared bumblebee abundance and alpha and beta diversity on seven different semi-natural habitat types in 10 two km radius areas (five bisected by a transmission corridor and five not) across 1156km<sup>2</sup>. Specifically we asked,

1. Whether areas bisected by a transmission corridor have a greater bumblebee abundance and/or greater bumblebee alpha and beta diversity than similar sized areas not containing a transmission corridor?
2. What is the difference in bumblebee's abundance of ecosystem service providers and threatened species across the seven surveyed habitat types?
3. What influence does flower abundance and forage plant species have on bumblebee abundance and diversity across all seven habitat types?
4. What is the relative cost of specific habitat management and/or enhancement?

## **Method and materials**

### **Site selection**

The Swedish national transmission corridor grid (the system of 220-400 kV lines) occupies approximately 40,000 hectares, with 36,000 hectares being uneconomic to cultivate, bordered by forest and so requires maintaining. In arable areas the approximately 60m<sup>2</sup> areas at the transmission tower's bases (hereafter the tower bases) require maintenance as these can't be cultivated. This network is owned, maintained and operated by Svenska kraftnät (SK), a state-owned public utility. SK's transmission corridors are subject to an easement that allows them the perpetual right to construct, keep and maintain the transmission corridor grid on the owner's land. In the Uppland region transmission

118 corridors are maintained on an eight year cycle. In year zero transmission corridors are  
119 cleared of tall vegetation, year three trees threatening transmission lines are felled, year  
120 four transmission corridor access roads are cleared and year seven fast growing trees are  
121 felled. SK's maintenance is done solely by mechanical means. (J Bjermkvist, SK, pers  
122 comm.)

123 To investigate transmission corridors influence on the surrounding area, we selected ten  
124 areas of four km<sup>2</sup> (2 x 2 km squares) in Sweden's Uppland region. All were approximately  
125 50% closed canopy forest 50% open areas (range 45-70%), and were between 3.2 and  
126 6.4km apart. There can be a wide variation in foraging distances between species, with  
127 radio-tracked *B. terrestris* and *B. ruderatus* workers foraging up to 2.5km and 1.9km  
128 respectively from their respective nest (Hagen et al. 2011), while *B. muscorum* have a  
129 much smaller foraging range of between 100-500m from their nest (Walter-Hellwig &  
130 Frankl 2000). The distances between our study's surveyed areas therefore minimised the  
131 chance that bumblebees recorded in one area were also recorded in another. Five sites  
132 were bisected by a section of transmission corridor (widths ranging between 50-70m), of  
133 which between 1.2-1.5km km was bordered by closed canopy forest. At the time of  
134 surveying four sites were in year three of their maintenance schedule (all the tall  
135 vegetation was removed in 2011), the remainder was in year six (all tall vegetation was  
136 removed in 2008). The other five sites were at least three km from any transmission  
137 corridor. Stretches of between 0-3km of the maintained ten metre wide 230V transmission  
138 line corridors, an ubiquitous feature in Uppland, were present in most sites. As the  
139 maintained but shaded sections of these smaller transmission corridors provided little or  
140 no flowering plant habitat, hence containing limited bumblebee foraging habitat (*pers ob*),  
141 we consider their presence is unlikely to have affected our results.

142 In order to capture the main habitat types present, we conducted multiple transects per  
143 area. Overall, we surveyed 158 transects spread across seven habitat types, six of which  
144 have previously been identified as valuable bumblebee habitat (Svensson et al. 2000). The  
145 158 transects consisted of 32 transmission corridor sites, 18 sites on maintained  
146 roadsides, 18 in forests, 19 along forest/grassland boundaries, 20 within semi-natural  
147 grasslands, 29 within cereal crop edges and 22 within maintained drains. To our

148 knowledge none of the surveyed transects were in areas that had been purposely  
 149 ecologically enhanced. The surveyed roadsides (all quiet tertiary or quaternary roads) are  
 150 mown annually (*pers comm.* M. Lindqvist, Trafikverket) whilst drains are maintained on an  
 151 as-needed basis. The semi-natural grasslands surveyed comprised of areas meeting the  
 152 EU's definition of permanent pasture and grassland (EU 2009). Each transect consisted of  
 153 a 50m long by 3m wide by area situated in a section containing a high density of flowering  
 154 plants. Within the selected section we surveyed for bumblebee abundance and diversity by  
 155 slowly walking along it for 15 minutes. Where possible the bumblebees were identified  
 156 while flying or foraging. Those that couldn't be readily identified were caught by net, and if  
 157 possible identified then released. Caught specimens not identified in the field were killed  
 158 then identified later. *B. terrestris* and *B. lucorum* were combined as *B. terrestris* (Carvell et  
 159 al. 2004). Collection handling time was discounted and if the transect's end was reached  
 160 before 15 minutes it was walked back again. The host plant of each foraging bumblebee  
 161 was also identified to species level. To correspond with peak bumblebee activity in  
 162 Uppland (Svennson et al, 2002) each site was surveyed twice between 9<sup>th</sup> July 2014 and  
 163 25<sup>th</sup> August 2014, with at least 2 weeks between each survey. All surveys were undertaken  
 164 between 9 am and 5.30 pm and only during dry periods in temperatures above 15 °C.  
 165 Flower density on the transect was estimated as the total percentage of the transect area  
 166 covered by flowers (categories used: "<1%", "1-5%", "6-10%", "11-20%", "21-40%", "41-  
 167 60%" and ">61%" coverage). As all surveying was conducted by one person this semi-  
 168 quantitative measure enabled a quick yet consistent assessment of flower density on all  
 169 transects.

## 170 **Statistical analysis:**

171 In order to compare species abundance and richness (alpha diversity) across sites, and  
 172 habitats, we build a generalized linear model with species richness or abundance per  
 173 transect as a function of site type (transmission corridors/non transmission corridor) and  
 174 habitat. Flower density was also included as a covariable. To account for the hierarchical  
 175 structure of the data, transect, nested in site was included as random factor. Residuals  
 176 were investigated to ensure they fulfilled the model assumptions and to meet the  
 177 assumptions of homoscedasticity we used a constant variance function.



178 Beta diversity was analysed on two scales. First, we investigated if sites containing a  
 179 transmission corridor have lower turnover rates among the different habitats. We expect  
 180 transmission corridors to connect different habitats and allowing for a higher dispersal of  
 181 bumblebees, hence lowering overall beta diversity. Second, we investigated beta diversity  
 182 among different areas of the same habitat. We expect more disturbed habitats (e.g. crop  
 183 edges) to be used by the same opportunistic species in all sites (low beta diversity), while  
 184 semi-natural habitats to contain a more unique composition among sites (high beta  
 185 diversity). To determine species turnover, we used additive partitioning of species richness  
 186 (Tylianakis et al. 2005, Lande 1996, Veech et al. 2002, Crist et al. 2003). Alpha diversity  
 187 was defined as the mean number of species per plot (i.e. species richness). Transmission  
 188 corridor sites beta diversity was calculated as the total number species found within a  
 189 corridor site (gamma diversity) minus the mean number of species per plot of that  
 190 transmission corridor site (alpha). Habitat beta diversity was calculated as the rarefied  
 191 number species found across all habitats of a given type (gamma) minus the mean  
 192 number of species per plot of that habitat type (alpha). Rarefaction in gamma diversity  
 193 was done to 90 individuals to avoid difference in sampling intensity across habitats.

194 From the pool of bumblebee species recorded, we explored which habitats are used by  
 195 bumblebees listed by IUCN (Nieto et al. 2014) as threatened in Europe: *B. muscorum*; and  
 196 listed as declining elsewhere in Europe (Shepper et al. 2013): *B. humilis*, *B. sylvarum* and  
 197 *B. soroensis*, hereby termed threatened species. We also recorded which habitats are  
 198 used by species that are the main providers of the ecosystem service crop pollination in  
 199 Europe, being *B. terrestris*, *B. lapidarius*, *B. pascuorum*, *B. hypnorum*, *B. pratorum* and *B.*  
 200 *hortorum* (Klejn et al. 2015), hereby termed provider species. We built a generalized linear  
 201 model with abundance of threatened species and abundance of provider species per  
 202 transect as a function of habitat and flower density. Transect, nested in site was also  
 203 included as random factor and to meet the model assumptions of homoscedasticity we  
 204 used a constant variance function.

205 Finally, to assess plant importance for bumblebees in the surveyed habitats, we calculated  
 206 for the plant- bumblebee recorded interactions the plant strengths (Bascompte et al. 2006)  
 207 for the pool of transmission corridor habitats, semi-natural grassland habitats and all

habitats combined. Strengths are defined as the sum of pollinators' dependencies on that plant, being pollinators' dependencies the fractions of visits done to that plant with respect to all its visits. In that way, a plant can have high strength values if it attracts lots of pollinators that depend little on it, or if it attract a few pollinators, but that depend a lot on it. Note that this metric highlights plant use, not preference. A plant can be used a lot mainly because its the most abundant, not because is preferred.

The costs of maintaining and/or enhancing the relevant habitat types were gathered from EU member material (Defra 2014; Scottish Government 2009), peer-reviewed literature (Dahlström et al. 2013) Svenska kraftnät and Trafikverket (the Swedish Transport Administration).

## Results

In total we recorded 1016 specimens, comprising 20 bumblebee species. These were recorded foraging on 24 plant species.

Having a transmission corridor bisecting the area did not change abundance (Table 1, Fig 1A) or richness of bumblebees (Table 1, Fig 1B). Similarly, we found no differences among habitats in total abundance or richness (Table 1, Fig 2 A and B). As expected flower abundance is the strongest predictor of bumblebee abundance and richness (Table 1).

Patterns of species beta diversity reveal that sites with a bisecting transmission corridor are not more homogenous in species composition than sites without a transmission corridor (test for differences in beta diversity:  $n = 10$ ,  $F_{1,8} = 0.03$ ,  $P = 0.85$ , Fig 1B). We also show that species turnover among plots of the same habitat is similar with all habitats harboring between 11 and 15 rarefied species (i.e. gamma diversity; Fig 2B).

Provider species were present in most habitats. *B. pascuorum* and *B. terrestris* were the most abundant and ubiquitous species, present in all habitats, while *B. lapidarius* was found in all habitats except forest. Overall the abundance of provider species is not different across habitats (Fig 3A, Table 2). Interestingly, threatened species were found not only in grasslands (*B. sylvarum* and *soroeensis*), but also in roadsides (*B. humilis*, *soroeensis* and *sylvarum*) and transmission corridors (*B. muscorum* and *humilis*), but were rarely found in the other habitat types (Fig 3B, Table 2). Flower abundance does not



237 explaining threatened species abundance (Table 2).

238 Throughout all the studied areas *Carduus crispus*, *Trifolium pratense* and *Centaurea jacea*  
239 were the most important foraging plants for sustaining both threatened and provider  
240 species (Table 3, Fig 4). However, plant importance varied between transmission corridors  
241 and grasslands. For example species in the genus *Trifolium* are more important in  
242 grasslands than in transmission corridors due to its abundance. Overall, important plant  
243 species sustains many species not heavily reliant on it as well as threatened species (e.g.  
244 *B. sylvarum*, *B. humilis*; Fig. 4).

245 The costs of maintaining and/or ecologically enhancing habitats were varied. For example,  
246 the current maintenance of transmission corridors in Uppland costs approximately €60/ha  
247 per year (J Bjermkvist, SK, pers comm.) and the cost of mowing Uppland roadsides similar  
248 to those surveyed costs between €500-1000/ha per year. (pers comm. M. Lindqvist,  
249 Trafikverket). Such maintenance is fundamental to these network's operation and hence  
250 there is no obvious reason that it be discontinued in the foreseeable future. In comparison,  
251 the EU resourcing of Swedish AES' for grassland maintenance and enhancement costs  
252 between €121-506/ha per year (Dahlström et al. 2013), while in the UK ecological  
253 enhancement of arable areas costs approximately € 350/ha per year (Lye et al). The two  
254 wild pollinator habitat enhancement options (low and high inputs) recommended by Cavell  
255 et al. (2007) range between € 42-679/ha/year respectively.

## 256 Discussion

257 The current transmission corridor maintenance regime results in these areas having  
258 bumblebee abundance and diversity equivalent to that recorded on the semi-natural  
259 grasslands and supports the increasing recognition that such areas are valuable wild  
260 pollinator habitat. The similarity in bumblebee abundance and diversity between  
261 transmission corridors and grasslands, especially for threatened species, is significant as  
262 in Sweden (Svennson et al. 2002; Sandell, J 2007) as well as the rest of the EU (EU 2015)  
263 such grasslands are recognized as being both highly valuable areas of biodiversity and  
264 significant bumblebee habitat but their area has been drastically reduced over the last 100  
265 years.

266 Road sides and transmission corridors, both extensively modified areas, provide habitat for  
 267 threatened and provider species in Sweden. Bumblebees of these groups have numbers  
 268 of individuals per transect similar to those found in grasslands or forest/grassland  
 269 boundaries. The studied road sides are all quiet rural roads with little traffic and tend to be  
 270 rich in flower cover (30% coverage on average, similar to that found in grasslands).  
 271 However, maintained drains and crop edges also have a good flower coverage similar to  
 272 transmission corridors (13-20%), but sustain less bumblebee individuals, specially of  
 273 threatened species. It is possible that the dense grass sward observed in many of the  
 274 surveyed drains limited the habitat available for the light demanding, low growing and  
 275 favoured foraging species such as *T. pratense* (Kleijn and Raemakers 2008), while overall  
 276 surveyed crop edges were the narrowest habitat type and hence provided the least  
 277 amount of habitat for foraging plants (<1m), thereby providing limited habitat. As forested  
 278 areas of tall evergreen trees (predominantly *Pinus sylvestris* and *Picea abies*) had little  
 279 flower cover (average of 5%) it's not surprising that they host few bumblebees. In  
 280 comparison, transmission corridors and roads bisecting those forest patches are flower  
 281 rich areas and may have an aggregation effect concentrating the surrounding pollinators in  
 282 resource rich areas (Lye et al. 2009). However, note that flower cover does not explain  
 283 threatened species abundance, indicating that other factors, like nesting sites may be  
 284 more limiting for this species (Lye et al. 2009). While the effect of electric and magnetic  
 285 field radiation from high voltage powerlines has little known direct effect on bees (Wojcik &  
 286 Buchmann 2012) and quiet roads may represent a minor threat to bumblebees (Hopwood  
 287 2008), these potential risks may be countered by being suitable small rodent habitat,  
 288 thereby potentially increasing nesting availability (Svennson et al. 2002, Clarke et  
 289 al.2008). Despite these important local effects, our results do not indicate that transmission  
 290 corridors enhance the overall abundance or richness of bumblebee species on the area for  
 291 example, by better connecting open habitats or by having a spillover effect on surrounding  
 292 habitats.

293 From our observations there is considerable potential for enhancing bumblebee habitat on  
 294 transmission corridors, as within these the main forage plants are mostly limited to smaller  
 295 areas not dominated by shading shrubby vegetation (*pers ob*). With floral abundance

being a major determinant in bumblebee diversity and abundance there's the opportunity for tailored enhancement work. Our results also support the importance of legumes and other nectar rich flowers as significant resources for most bumblebee species (Kleijn and Raemakers 2008). However, in comparison with semi-natural grasslands, transmission corridors have less representation of some key plants like *T. pratense*. As a possible means of enhancing bumblebee populations, those could be sown in transmission corridors. For arable areas this strategy is already prescribed under the UK's AES' (Dicks et al. 2015, Cavell et al. 2007). In addition, early flowering *salix* species such as *Salix caprea* are of key importance to the foraging of early emerging bumblebee queens and subsequently their successful colony establishment, with >1000m<sup>3</sup> crown volume/ha positively influencing bumblebee abundance (Svensson 2002). During our pre-survey visits to select the study areas we noted emerging queens foraging on *salix* species on the transmission corridor edges. Maintaining *salix* spp and increasing their abundance in areas of transmission corridors where they don't threaten the powerline is a yet untested, but a potential habitat enhancement method. However, flower abundance later in the season is maybe the most critical for later emerging species as denoted by the fact that most threatened bumblebee species occur late on the season (Scheper et al. 2014). Increasing the amount of open habitat within transmission corridors, by removing woody shrubs and dense grass swards then enhancing strategic sections into flower-rich habitat could also be a way of increasing foraging plant habitat and hence bumblebee diversity and abundance (Russell et al. 2005, Noordijk et al. 2009, Dicks et al. 2015), but would likely increase maintenance costs. Such actions could assist in providing the approximately 2% of flower-rich habitat within 100ha of farmland required to maintain and support provider species colonies (Dick et al. 2015).

Agriculturally unproductive areas within transmission corridors will continue to be maintained in the long-term, and this level of maintenance should continue to provide bumblebee habitat equivalent to that on grasslands. As the maintenance of transmission corridors is simple, standard and easily applied, funding the enhancement of biodiversity in maintained, unproductive areas within transmission corridors could be an effective way both enhance bumblebee conservation and the ecosystem service they provide. The

326 application of such enhancement techniques would enhance the ecological value of these  
 327 often thought-of waste lands without any opportunity cost through lost economic return on  
 328 the land. Opportunity costs can be considerable, as for example winter wheat, the major  
 329 crop in Uppland, can provide a farmer of returns between approximately €565/ha-  
 330 €1505/ha (Production of cereals 2014; Wheat Price Daily 2015). The permanence of  
 331 maintained infrastructure corridors in the landscape also means that any enhancement on  
 332 them is likely to provide long-term benefits. Such actions would likely aid in the meeting of  
 333 the EU's *Biodiversity Strategy to 2020* of “*Halting the loss of biodiversity and the*  
 334 *degradation of ecosystem services in the EU by 2020*” (EU 2011).

335 Currently, the EU AES' are limited to areas that are cultivated for crop production or  
 336 maintained in good agricultural and environmental condition (EU 2013), and no alternative  
 337 funding is directed to regularly maintained areas such as transmission corridors and other  
 338 maintained infrastructure corridors, where tall vegetation is controlled for utilitarian  
 339 purposes. The use of transmission corridors as pollinator habitat is limited to certain areas  
 340 and can not substitute AES, but can complement it. It has been shown in other contexts  
 341 that tailoring of inputs for specific results is possible, with the application of AES' in simple,  
 342 resource poor landscapes eg croplands, having the greatest benefit to provider species,  
 343 whilst applying AES' in more complex landscapes provides more benefit to threatened  
 344 species (Scheper et al. 2013). The extensive geographic extent of transmission corridors  
 345 through many landscapes in northern Europe provides valuable but yet to be tapped  
 346 opportunities for bumblebee conservation. However, how good are transmission corridors  
 347 for other organisms remains to be tested.

## 348 **Conclusions**

349 Bumblebee abundance and diversity is threatened by many factors. Given both the  
 350 intrinsic value of bumblebees and the ecosystem service they provide actions are being  
 351 taken to counter these threats. Ours and others studies have shown that the creation of  
 352 valuable wild pollinator habitat is an unintended byproduct of the maintenance of  
 353 transmission and other infrastructure corridors. Our study also shows that if a  
 354 management goal is the maintenance of valuable wild pollinator habitat, the current  
 355 transmission corridor maintenance regime is a cost-effective approach that can be

356 considered. The permanence and extent of transmission corridors in the landscape and  
 357 the need for their regular maintenance means that any wild pollinator habitat created within  
 358 them will persist. There are simple, proven management practices to enhancing bumble  
 359 richness and abundance but more research is needed to evaluate and optimize the types  
 360 and locations of conservation actions. We need a logical source of funding for such work  
 361 and any future reviews of the Europe 2020 Strategy, CAP, or other relevant EU policy may  
 362 provide opportunities to expand the habitat enhancements to such valuable pollinator  
 363 habitat provided by maintained infrastructure corridors.

364 All data and code to reproduce this analysis are deposited in

365 [www.github.com/ibartomeus/powerlines](http://www.github.com/ibartomeus/powerlines)

# 366 **Acknowledgements:**

367 We thank WSP Sverige for providing logistic support. BH was funded by SK for solely  
 368 transport and field expenses. IB was funded by EU project BeeFun (PCIG14-GA-2013-  
 369 631653). SK do not took part in experimental design or data interpretation. We thank  
 370 David Kleijn for comments in a previous draft and Gerald Malsher and Björn Cederberg  
 371 (Sveriges lantbruksuniversitet/Swedish University of Agricultural Sciences) for identifying  
 372 several bumblebee specimens.

## 373 **Tables and figures:**

374 **Table 1:** Flower density is the main predictor explaining bumblebee abundances and  
375 richness. Having a transmission corridor bisecting the landscape does not increase  
376 abundance or richness. The table show bumblebee abundance and richness models.

| <b>Bumblebee abundance</b> | <b>Degrees of freedom</b> | <b>F-value</b> | <b>p-value</b> |
|----------------------------|---------------------------|----------------|----------------|
| Flower density             | 1,73                      | 13.25          | <.001          |
| Habitat                    | 6,73                      | 1.67           | 0.14           |
| Transmission corridor      | 1,8                       | 1.16           | 0.31           |
| <b>Bumblebee richness</b>  |                           |                |                |
| Flower density             | 1,73                      | 11.73          | 0.001          |
| Habitat                    | 6,73                      | 1.33           | 0.25           |
| Transmission corridor      | 1,8                       | 2.96           | 0.12           |

377

378 **Table 2:** Abundance differences across habitats for ecosystem services provider and  
379 threatened species. While provider specie mirror the general abundance pattern, for  
380 threatened species we found habitat differences, but flower cover is not longer significant.

| <b>Provider species abundance</b>   | <b>Degrees of freedom</b> | <b>F-value</b> | <b>p-value</b> |
|-------------------------------------|---------------------------|----------------|----------------|
| Flower density                      | 1, 134                    | 11.01          | 0.001          |
| Habitat                             | 6, 134                    | 1.52           | 0.18           |
| <b>Threatened species abundance</b> |                           |                |                |
| Flower density                      | 1, 62                     | 0.02           | 0.89           |
| Habitat                             | 6, 62                     | 2.72           | 0.02           |

381

382 **Table 3:** Plant species strengths (the sum of pollinator dependencies) across all  
383 interactions observed in transmission corridors, grasslands and over all habitats. Ranking  
384 are in parenthesis because raw numbers ca not be compared among habitats. Plants with  
385 high strengths are the most important in supporting a combination of ecosystem service  
386 providers and threatened species. Strength values can be high because plants support  
387 several pollinators with low dependence on the plant, or because it supports pollinators  
388 that depend a lot on the plant for foraging.

| <b>Plant Species</b> | <b>Strength (all</b> | <b>Strength</b> | <b>Strength</b> |
|----------------------|----------------------|-----------------|-----------------|
|----------------------|----------------------|-----------------|-----------------|



|                                    | habitats) | (corridors) | (grasslands) |
|------------------------------------|-----------|-------------|--------------|
| <i>Centaurea jacea</i>             | 3.49 (1)  | 4.71 (2)    | 1.00 (6)     |
| <i>Trifolium pratense</i>          | 2.85 (2)  | 0.36 (8)    | 2.82 (2)     |
| <i>Carduus crispus</i>             | 2.28 (3)  | 6.43 (1)    | 0.63 (7)     |
| <i>Cirsium arvense</i>             | 1.80 (4)  | 0.85 (6)    | 3.09 (1)     |
| <i>Calluna vulgaris</i>            | 1.31 (5)  | 2.42 (3)    | -            |
| <i>Lythraceae salcaria</i>         | 1.12 (6)  | 1.35 (4)    | -            |
| <i>Trifolium hybridum</i>          | 0.75 (7)  | 0.27 (9)    | 1.14 (5)     |
| <i>Satureja vulgaris</i>           | 0.71 (8)  | 0.02 (12)   | 1.35 (4)     |
| <i>Centaurea scabiosa</i>          | 0.70 (9)  | -           | -            |
| <i>Succisa pratensis</i>           | 0.67 (10) | 0.96 (5)    | -            |
| <i>Trifolium repens</i>            | 0.54 (11) | -           | -            |
| <i>Lathyrus pratensis</i>          | 0.44 (12) | 0.05 (11)   | 0.56 (8)     |
| <i>Leontodon autumnalis</i>        | 0.43 (13) | -           | 1.81 (3)     |
| <i>Campanulaceae rapunculoides</i> | 0.32 (14) | -           | -            |
| <i>Filipendula ulmaria</i>         | 0.24 (15) | 0.44 (7)    | 0.08 (10)    |
| <i>Melampyrum pratense</i>         | 0.17 (16) | -           | 0.43 (9)     |
| <i>Centaurea cyanus</i>            | 0.16 (17) | -           | -            |
| <i>Carduus helenioides</i>         | 0.14 (18) | -           | -            |
| <i>Arctium tomentosum</i>          | 0.12 (19) | -           | -            |
| <i>Malva spp</i>                   | 0.11 (20) | -           | -            |
| <i>Campanulaceae rotundifolia</i>  | 0.11 (21) | -           | -            |
| <i>Crepis tectorum</i>             | 0.10 (22) | -           | -            |
| <i>Prunella vulgaris</i>           | 0.07 (23) | -           | -            |
| <i>Epilobium adenocaulon</i>       | 0.06 (24) | -           | -            |
| <i>Vicia cracca</i>                | 0.06 (25) | -           | 0.05 (11)    |
| <i>Lamium maculatum</i>            | 0.06 (26) | -           | -            |
| <i>Trifolium medium</i>            | 0.05 (27) | -           | -            |
| <i>Galeopsis terrahit</i>          | 0.04 (28) | -           | -            |
| <i>Carduus arvense</i>             | 0.03 (29) | 0.12 (10)   | -            |
| <i>Solidago virgaurea</i>          | 0.03 (30) | -           | -            |

|                            |           |   |   |
|----------------------------|-----------|---|---|
| <i>Lamium galeobdolon</i>  | 0.02 (31) | - | - |
| <i>Hypericum maculatum</i> | 0.01 (32) | - | - |
| <i>Taraxacum spp</i>       | 0.01 (33) | - | - |
| <i>Sonchus glabrescens</i> | 0.01 (34) | - | - |

389

390 **Figure 1:** Species abundance and richness is not different in sites bisected or not by a  
391 transmission corridor. A) Mean number of individuals collected per plot in transmission  
392 corridor and non transmission corridor sites. B) Mean species richness per plot in  
393 transmission corridor and non transmission corridor sites (black bars) and species beta  
394 diversity (grey bars) across habitats in sites with and without transmission corridor (grey  
395 bars). The sum of both bars can be seen as the gamma diversity of each site (n = 10  
396 sites).

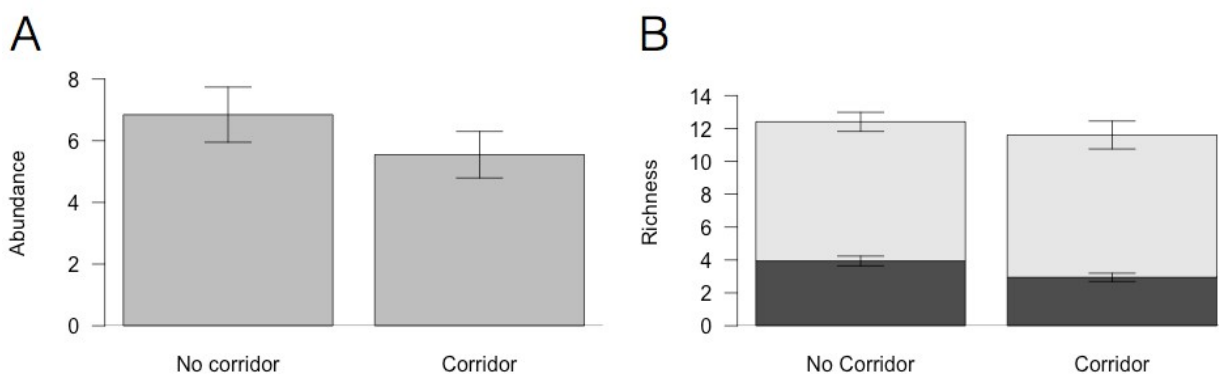

398 **Figure 2:** Species abundance and richness is not different across habitats. A) Mean  
 399 number of individuals collected per plot in each habitat. B) Mean species richness per  
 400 habitat (black bars) and species beta diversity (grey bars) between different plots of the  
 401 same habitat. The sum of both bars can be seen as the gamma diversity of each habitat.

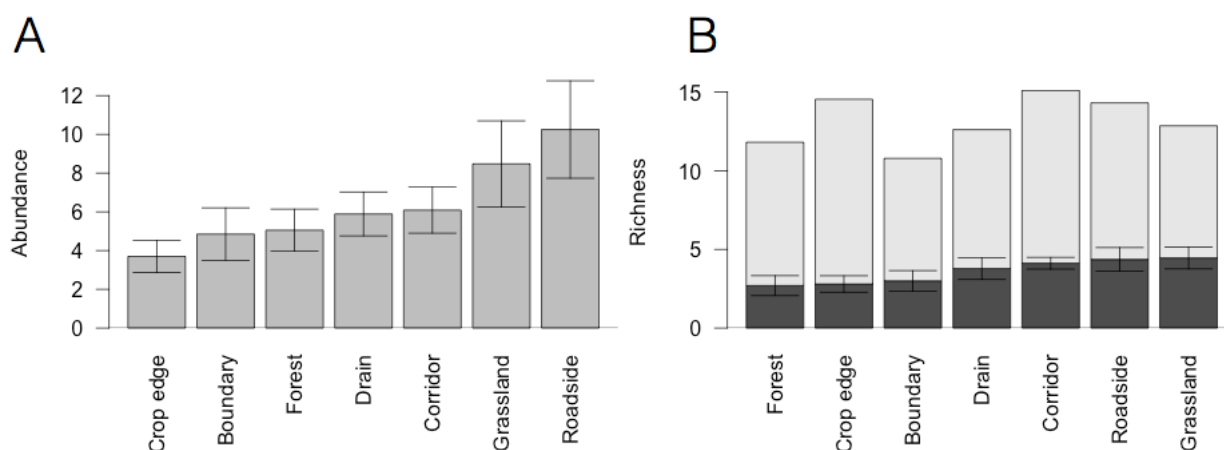

403 **Figure 3:** Species abundance of A) ecosystem service providers is not different across  
 404 habitats while for B) conservation value species, transmission corridors, roadsides,  
 405 grasslands and grassland-forest boundaries have higher abundances than the other  
 406 habitats. The bars represent the mean number of individuals collected per plot in each  
 407 habitat.

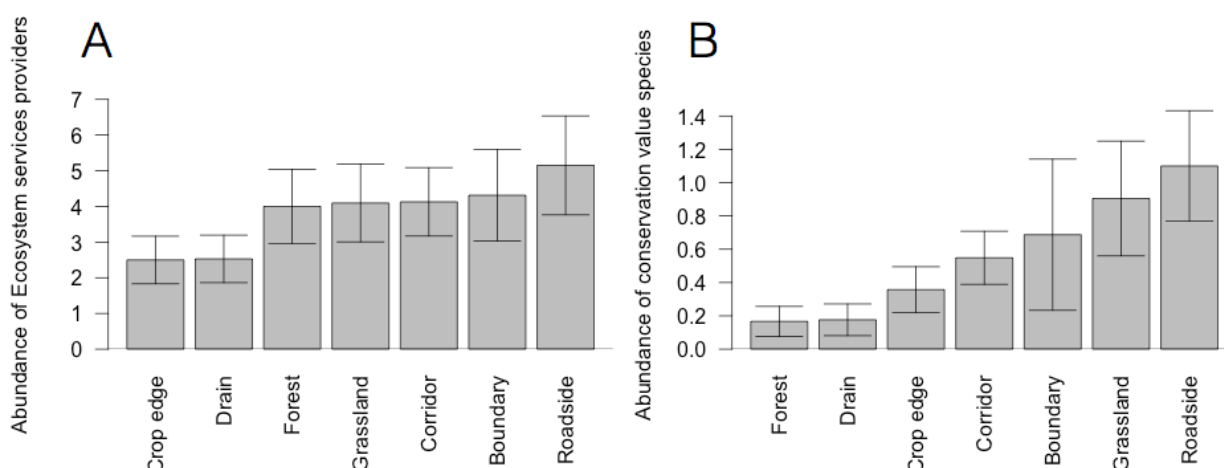

409

410

411 **Figure 4:** Relationship between bumblebees and the plants they visit. Black boxes are  
 412 proportional to their total abundances. The grey links between bumblebees and the plants  
 413 they visit are proportional to the visitation frequency.

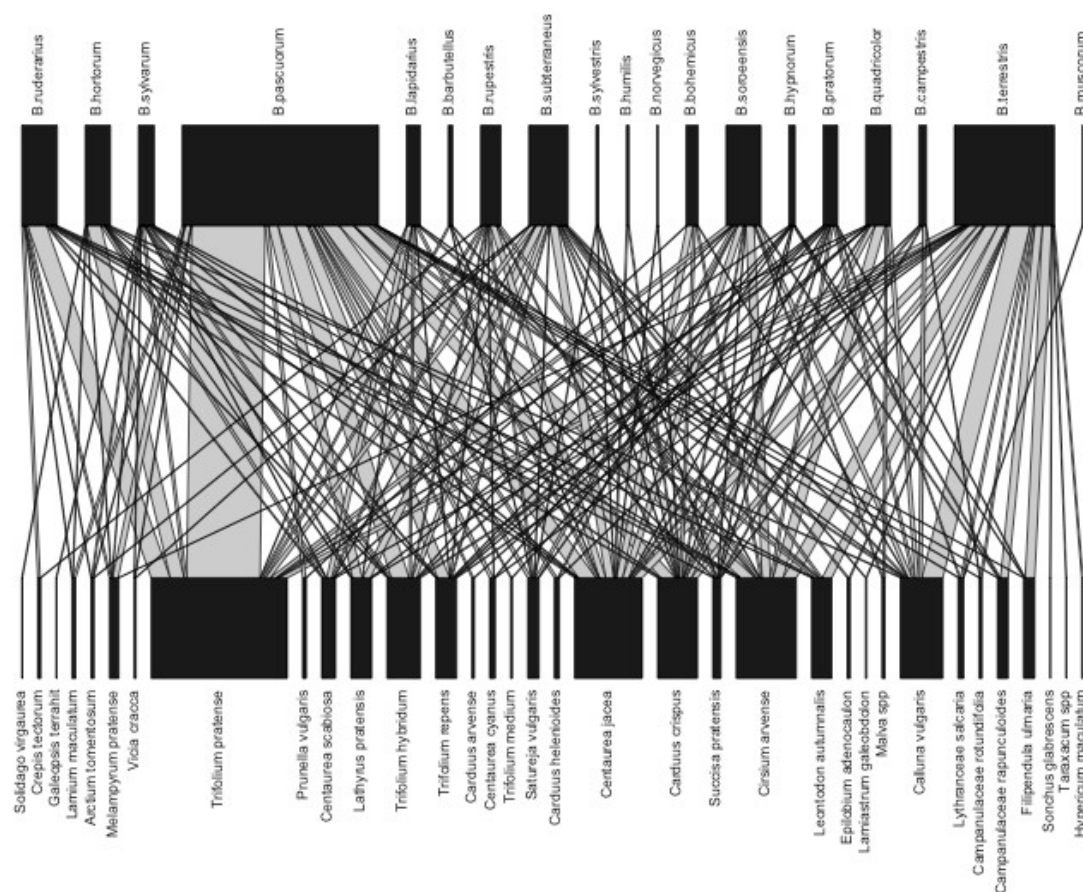

## 415 References:

- 416 Bascompte, J., Jordano, P., & Olesen, J. M. (2006). Asymmetric coevolutionary networks  
 417 facilitate biodiversity maintenance. *Science*, 312(5772), 431-433.
- 418 Bartomeus, I., Ascher, J. S., Gibbs, J., Danforth, B. N., Wagner, D. L., Hedtke, S. M., &  
 419 Winfree, R. (2013). Historical changes in northeastern US bee pollinators related to shared  
 420 ecological traits. *Proceedings of the National Academy of Sciences*, 110(12), 4656-4660.
- 421 Berg, Å., Åhrné, K., Öckinger, E., Svensson, R., & Söderström, B. (2011). Butterfly  
 422 distribution and abundance is affected by variation in the Swedish forest-farmland  
 423 landscape. *Biological conservation*, 144(12), 2819-2831.
- 424 Berg, Å., Åhrné, K., Öckinger, E., Svensson, R., & Wissman, J. (2013). Butterflies in semi

425 natural pastures and power line corridors—effects of flower richness, management, and  
 426 structural vegetation characteristics. *Insect conservation and diversity*, 6(6), 639-657.

427 Breeze, T. D., Bailey, A. P., Balcombe, K. G., & Potts, S. G. (2011). Pollination services in  
 428 the UK: How important are honeybees? *Agriculture, Ecosystems & Environment*, 142(3),  
 429 137-143.

430 Cameron, S. A., Lozier, J. D., Strange, J. P., Koch, J. B., Cordes, N., Solter, L. F., &  
 431 Griswold, T. L. (2011). Patterns of widespread decline in North American bumble bees.  
 432 *Proceedings of the National Academy of Sciences*, 108(2), 662-667.

433 Carvell, C., Meek, W. R., Pywell, R. F., & Nowakowski, M. (2004). The response of  
 434 foraging bumblebees to successional change in newly created arable field margins.  
 435 *Biological Conservation*, 118(3), 327-339.

436 Carvell, C., Meek, W. R., Pywell, R. F., Goulson, D., & Nowakowski, M. (2007). Comparing  
 437 the efficacy of agri environment schemes to enhance bumble bee abundance and diversity  
 438 on arable field margins. *Journal of Applied Ecology*, 44(1), 29-40.

439 Clarke, D. J., & White, J. G. (2008). Recolonisation of powerline corridor vegetation by  
 440 small mammals: timing and the influence of vegetation management. *Landscape and*  
 441 *urban planning*, 87(2), 108-116.

442 Corbet, S. A., Williams, I. H., & Osborne, J. L. (1991). Bees and the pollination of crops  
 443 and wild flowers in the European Community. *Bee world*, 72(2), 47-59.

444 Crist, T. O., J. A. Veech, J. C. Gering, and K. S. Summerville. 2003. Partitioning species  
 445 diversity across landscapes and regions: a hierarchical analysis of alfa, beta and gamma  
 446 diversity. *American Naturalist* 162:734–743

447 Dahlström, A., & Lennartsson, T. (2013). Managing biodiversity rich hay meadows in the  
 448 EU: a comparison of Swedish and Romanian grasslands. *Environmental Conservation*,  
 449 40(02), 194-205.

450 Defra (2014) Introducing Countryside Stewardship. Department for Environment, Food and  
 451 Rural Affairs, London, UK

452 Dicks, L. V., Baude, M., Roberts, S. P., Phillips, J., Green, M., & Carvell, C. (2015). How

453 much flower rich habitat is enough for wild pollinators? Answering a key policy question  
 454 with incomplete knowledge. *Ecological Entomology*.

455 Eldegard, K., Totland, Ø., & Moe, S. R. (2015). Edge effects on plant communities along  
 456 power line clearings. *Journal of Applied Ecology*.

457 EU 2013- Official Journal of the European Union L347, 17 December 2013 1-63

458 EU 2011- Our life insurance, our natural capital: An EU biodiversity strategy to 2020.  
 459 Brussels. 3.5.2011 COM(2011) 244 Final

460 EU 2014- Taking stock of Europe 2020 Strategy for smart, sustainable and inclusive  
 461 growth. Brussels, 19.3.2014 COM(2014) 130 final/2

462 Forrester, J. A., Leopold, D. J., & Hafner, S. D. (2005). Maintaining critical habitat in a  
 463 heavily managed landscape: effects of power line corridor management on Karner blue  
 464 butterfly (*Lycaeides melissa samuelis*) habitat. *Restoration Ecology*, 13(3), 488-498.

465 Gallai, N., Salles, J. M., Settele, J., & Vaissière, B. E. (2009). Economic valuation of the  
 466 vulnerability of world agriculture confronted with pollinator decline. *Ecological economics*,  
 467 68(3), 810-821.

468 Garibaldi, L. A., Steffan-Dewenter, I., Winfree, R., Aizen, M. A., Bommarco, R.,  
 469 Cunningham, S. A., & Klein, A. M. (2013). Wild pollinators enhance fruit set of crops  
 470 regardless of honey bee abundance. *Science*, 339(6127), 1608-1611.

471 González-Varo, J. P., Biesmeijer, J. C., Bommarco, R., Potts, S. G., Schweiger, O., Smith,  
 472 H. G., ... & Vilà, M. (2013). Combined effects of global change pressures on animal-  
 473 mediated pollination. *Trends in Ecology & Evolution*, 28(9), 524-530.

474 Haddad, N. M. (1999). Corridor and distance effects on interpatch movements: a  
 475 landscape experiment with butterflies. *Ecological Applications*, 9(2), 612-622.

476 Hagen M, Wikelski M, Kissling WD (2011) Space Use of Bumblebees (*Bombus* spp.)  
 477 Revealed by Radio-Tracking. PLoS ONE 6(5): e19997. doi:10.1371/journal.pone.0019997

478 Hanley, M. E., & Wilkins, J. P. (2015). On the verge? Preferential use of road-facing  
 479 hedgerow margins by bumblebees in agro-ecosystems. *Journal of Insect Conservation*,  
 480 19(1), 67-74.



481 Hopwood, J., Winkler, L., Deal, B., & Chivvis, M. (2010). Use of roadside prairie plantings  
482 by native bees. *Living Roadway Trust Fund [online]* URL: <http://www.iowalivingroadway.com/ResearchProjects/90-00-LRTF-011.pdf>.  
483

484 Klein, A. M., Vaissiere, B. E., Cane, J. H., Steffan-Dewenter, I., Cunningham, S. A.,  
485 Kremen, C., & Tscharntke, T. (2007). Importance of pollinators in changing landscapes for  
486 world crops. *Proceedings of the Royal Society of London B: Biological Sciences*,  
487 274(1608), 303-313.

488 Kleijn, D. & Raemakers, I. (2008) A retrospective analysis of pollen host plant use by  
489 stable and declining bumble bee species. *Ecology*, 89(7):1811-1823.

490 Kleijn, D., Winfree, R., Bartomeus, I., Carvalheiro, L. G., Henry, M., Isaacs, R., ... &  
491 Steffan-Dewenter, I. (2015). Delivery of crop pollination services is an insufficient argument  
492 for wild pollinator conservation. *Nature communications*, 6.

493 Lande, R. 1996. Statistics and partitioning of species diver- sity and similarity among  
494 multiple communities. *Oikos* 76: 5–13

495 Lye, G., Park, K., Osborne, J., Holland, J., & Goulson, D. (2009). Assessing the value of  
496 Rural Stewardship schemes for providing foraging resources and nesting habitat for  
497 bumblebee queens (Hymenoptera: Apidae). *Biological Conservation*, 142(10), 2023-2032.

498 Moro , D., Skórka, P., Lenda, M., Ro ej-Pabijan, E., Wantuch, M., Kajzer-Bonk, J., ... &  
499 Tryjanowski, P. (2014). Railway embankments as new habitat for pollinators in an  
500 agricultural landscape.

501 Nieto, A., Roberts, S.P.M., Kemp, J., Rasmont, P., Kuhlmann, M., García Criado, M.,  
502 Biesmeijer, J.C., Bogusch, P., Dathe, H.H., De la Rúa, P., De Meulemeester, T., Dehon, M.,  
503 Dewulf, A., Ortiz-Sánchez, F.J., Lhomme, P., Pauly, A., Potts, S.G., Praz, C., Quaranta, M.,  
504 Radchenko, V.G., Scheuchl, E., Smit, J., Straka, J., Terzo, M., Tomozii, B., Window, J. and  
505 Michez, D.. (2014). European red list of bees. *IUCN, European Commission, Luxembourg*.

506 Noordijk, J., Delille, K., Schaffers, A. P., & Sýkora, K. V. (2009). Optimizing grassland  
507 management for flower-visiting insects in roadside verges. *Biological Conservation*,  
508 142(10), 2097-2103.

509 Ollerton, J., Winfree, R., & Tarrant, S. (2011). How many flowering plants are pollinated by  
510 animals? *Oikos*, 120(3), 321-326.

511 Palmgren, E. Distribution of Semi-Natural Pastures in Sweden: A Comparison of Coverage  
512 Estimation Using Random Sampling and Total Registration Data Sets. M.Sc. Thesis,  
513 Swedish University of Agricultural Sciences, Uppsala, Sweden, 2010

514 Production of cereals, dried pulses and oilseeds in 2014. (n.d.). Retrieved August 29,  
515 2015, from [http://www.scb.se/en\\_/Finding-statistics/Statistics-by-subject-area/Agriculture-](http://www.scb.se/en_/Finding-statistics/Statistics-by-subject-area/Agriculture-forestry-and-fishery/Agricultural-production/Production-of-cereals-dried-pulses-and-oil-seed/Aktuell-Pong/9431/Behallare-for-Press/379926/)  
516 [forestry-and-fishery/Agricultural-production/Production-of-cereals-dried-pulses-and-oil-](http://www.scb.se/en_/Finding-statistics/Statistics-by-subject-area/Agriculture-forestry-and-fishery/Agricultural-production/Production-of-cereals-dried-pulses-and-oil-seed/Aktuell-Pong/9431/Behallare-for-Press/379926/)  
517 [seed/Aktuell-Pong/9431/Behallare-for-Press/379926/](http://www.scb.se/en_/Finding-statistics/Statistics-by-subject-area/Agriculture-forestry-and-fishery/Agricultural-production/Production-of-cereals-dried-pulses-and-oil-seed/Aktuell-Pong/9431/Behallare-for-Press/379926/)

518 Russell, K. N., Ikerd, H., & Droege, S. (2005). The potential conservation value of  
519 unmowed powerline strips for native bees. *Biological Conservation*, 124(1), 133-148.

520 Sandell, J. Bumblebee distribution in space and time in three landscapes in south eastern  
521 Sweden. *Forest*, 38(6), 57.

522 Scheper, J., Holzschuh, A., Kuussaari, M., Potts, S. G., Rundlöf, M., Smith, H. G., & Kleijn,  
523 D. (2013). Environmental factors driving the effectiveness of European agri environmental  
524 measures in mitigating pollinator loss—a meta analysis. *Ecology letters*, 16(7), 912-920.

525 Scheper, J., Reemer, M., van Kats, R., Ozinga, W. A., van der Linden, G. T., Schaminée, J.  
526 H., ... & Kleijn, D. (2014). Museum specimens reveal loss of pollen host plants as key  
527 factor driving wild bee decline in The Netherlands. *Proceedings of the National Academy*  
528 *of Sciences*, 111(49), 17552-17557.

529 Scottish Government (2009). Retrieved August 29, 2015, from  
530 [http://www.gov.scot/Topics/farmingrural/Agriculture/Environment/Agrienvironment/Rural/St](http://www.gov.scot/Topics/farmingrural/Agriculture/Environment/Agrienvironment/Rural/Steward)  
531 [eward](http://www.gov.scot/Topics/farmingrural/Agriculture/Environment/Agrienvironment/Rural/Steward)

532 Svensson, B., Lagerlöf, J., & Svensson, B. G. (2000). Habitat preferences of nest-seeking  
533 bumble bees (Hymenoptera: Apidae) in an agricultural landscape. *Agriculture, Ecosystems*  
534 *& Environment*, 77(3), 247-255.

535 Tylianakis, J. M., Klein, A. M., & Tscharntke, T. (2005). Spatiotemporal variation in the  
536 diversity of Hymenoptera across a tropical habitat gradient. *Ecology*, 86(12), 3296-3302.

537 Vanbergen, A. J., Baude, M., Biesmeijer, J. C., Britton, N. F., Brown, M. J., Brown, M., ... &  
538 Wright, G. A. (2013). Threats to an ecosystem service: pressures on pollinators. *Frontiers*  
539 *in Ecology and the Environment*, 11, 251-259.

540 Veech, J. A., K. S. Summerville, T. O. Crist, and J. C. Gering. 2002. The additive  
541 partitioning of diversity: recent revival of an old idea. *Oikos* 99:3–9.

542 Wagner, D. L., Metzler, K. J., Leicht-Young, S. A., & Motzkin, G. (2014). Vegetation  
543 composition along a New England transmission line corridor and its implications for other  
544 trophic levels. *Forest Ecology and Management*, 327, 231-239.

545 Walther-Hellwig K and Frankl R. (2000) Foraging habitats and foraging distances of  
546 bumblebees, *Bombus* spp. (Hym., Apidae), in an agricultural landscape. *Journal of Applied*  
547 *Entomology*. 124, 299±306

548 Wheat Daily Price. (n.d.). Retrieved August 29, 2015, from  
549 <http://www.indexmundi.com/commodities/?commodity=wheat&cy=eur>

550 Winfree, R., Bartomeus, I., & Cariveau, D. P. (2011). Native pollinators in anthropogenic  
551 habitats. *Annual Review of Ecology, Evolution, and Systematics*, 42(1), 1.

552 Wojcik, v. a., & Buchmann, s. (2012). Pollinator conservation and management on  
553 electrical transmission and roadside rights-of-way: a review. *Journal of Pollination Ecology*,  
554 7.
